# Supplementary material for: RNA-sequencing of the sturgeon Acipenser baeri provides insights into expression dynamics of morphogenic differentiation and developmental regulatory genes in early versus late developmental stages
Source: PubMed Central journal article supplement (PMC4977659; doi:10.1186/s12864-016-2839-3), 2016-08-08

**subcluster\_1, 417genes**

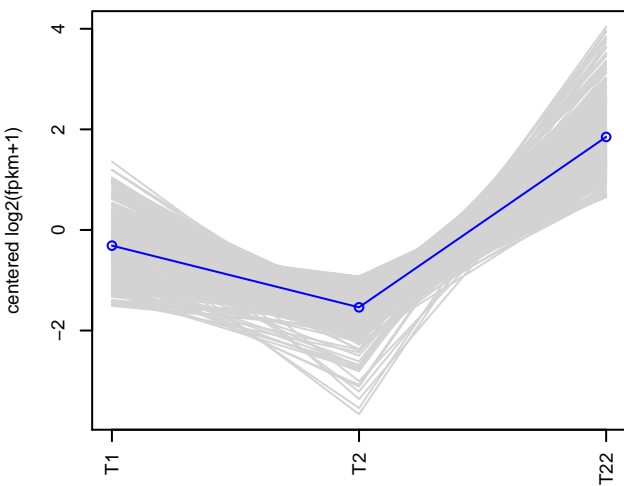

**subcluster\_2, 262genes**

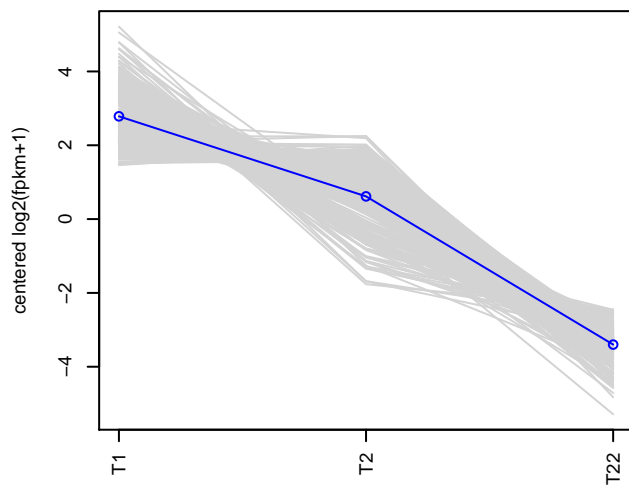

**subcluster\_3, 2310genes**

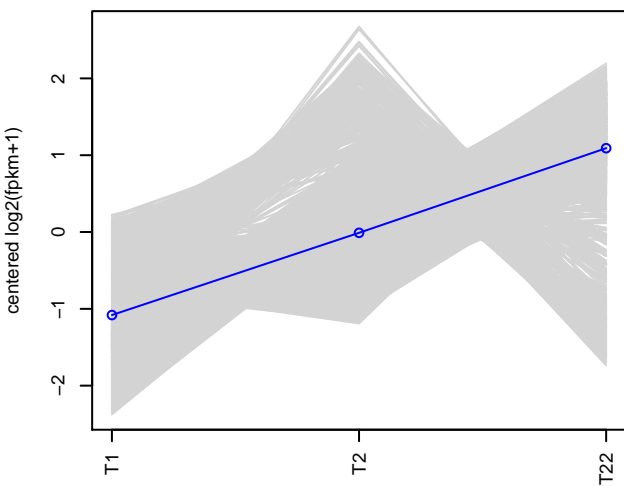

**subcluster\_4, 1077genes**

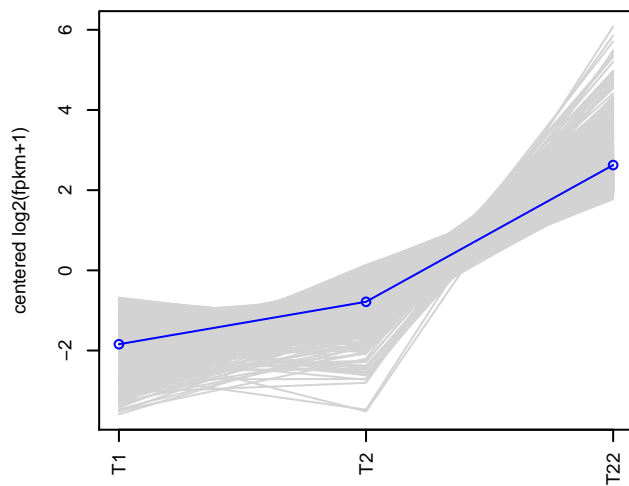

**subcluster\_5, 89genes**

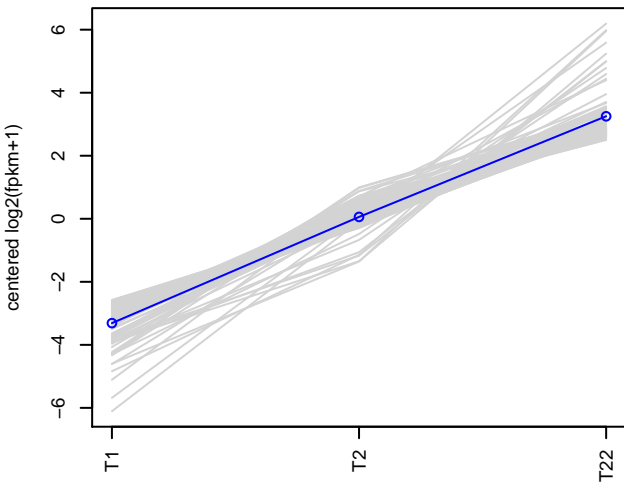

**subcluster\_6, 1096genes**

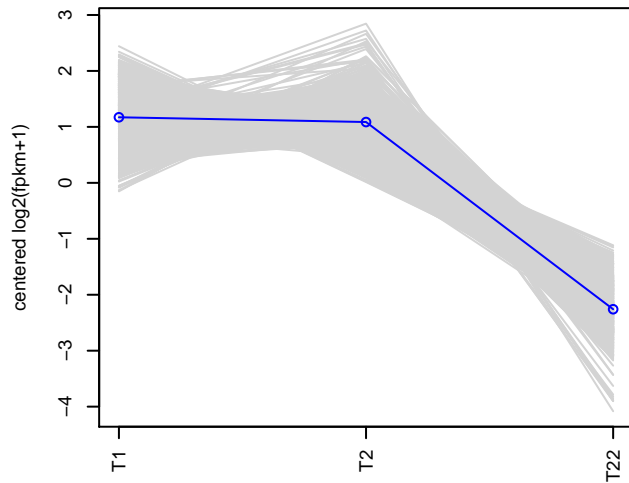

**subcluster\_7, 1425genes**

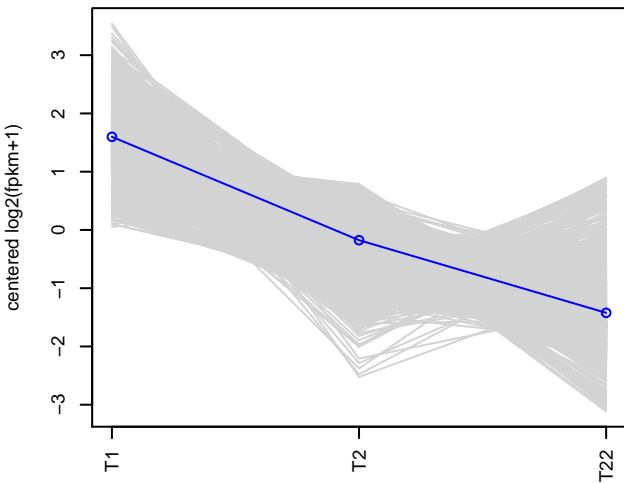

**subcluster\_8, 128genes**

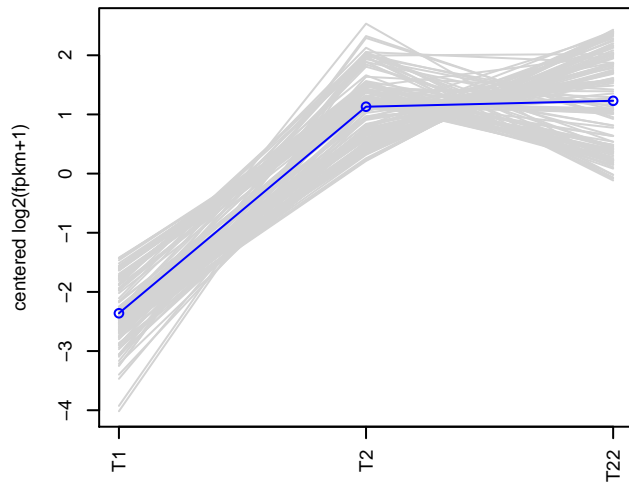

**subcluster\_9, 8genes**

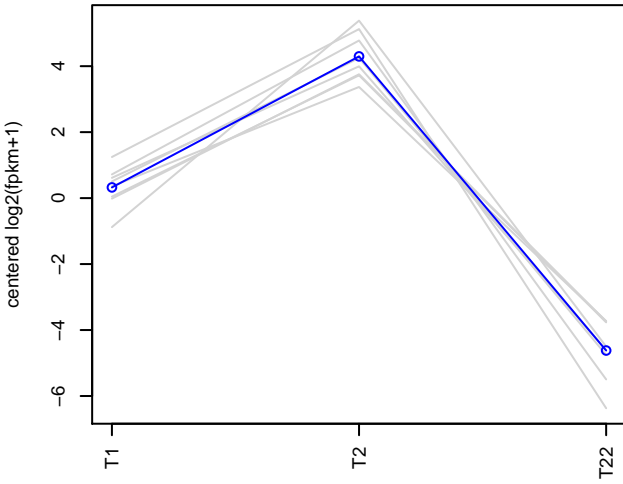

**subcluster\_10, 31genes**

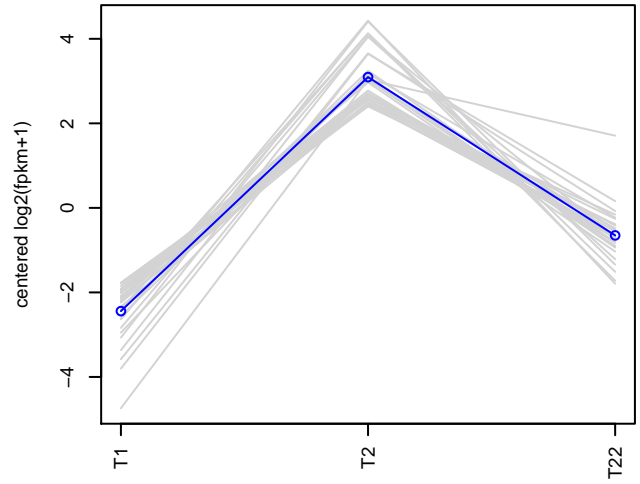

**subcluster\_11, 107genes**

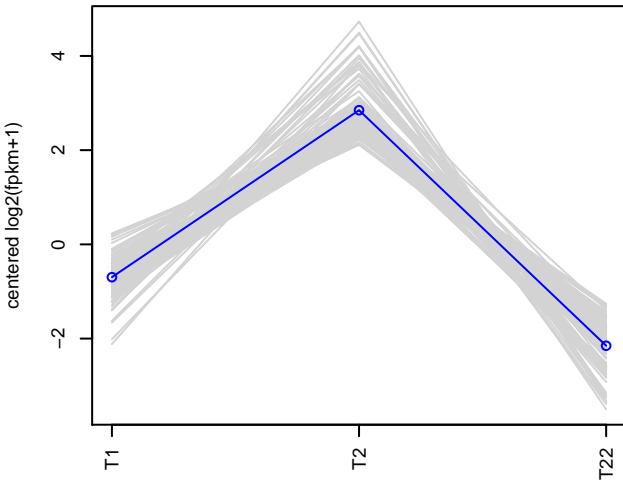

**subcluster\_12, 12genes**

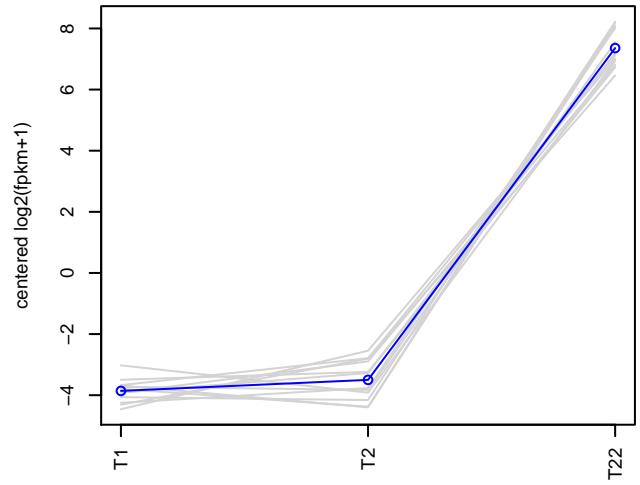

Supplement: 12864_2016_2839_MOESM12_ESM.pdf [file 12864_2016_2839_MOESM12_ESM.pdf]
