# Supplementary material for: RNA-sequencing of the sturgeon Acipenser baeri provides insights into expression dynamics of morphogenic differentiation and developmental regulatory genes in early versus late developmental stages
Source: PubMed Central journal article supplement (PMC4977659; doi:10.1186/s12864-016-2839-3), 2016-08-08
Supplement: 12864_2016_2839_MOESM22_ESM.pdf [file 12864_2016_2839_MOESM22_ESM.pdf]

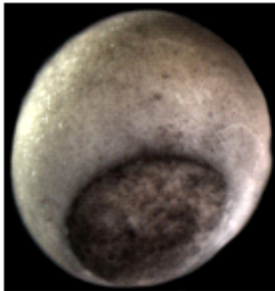

T1

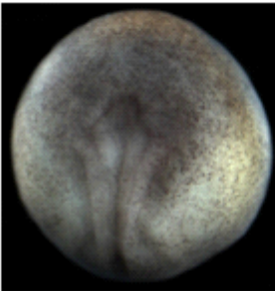

T2

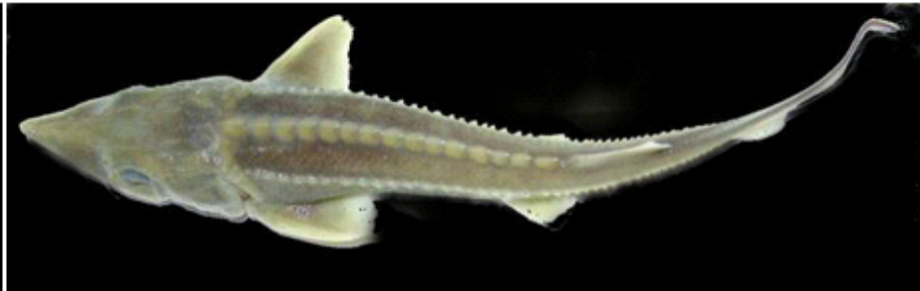

T22
